# Supplementary material for: Synthesis of EDTA-assisted CeVO4nanorods as robust peroxidase mimics towards colorimetric detection of H2O2
Source: Royal Society of Chemistry journal article supplement (doi:10.1039/c6tb01881e), 2016-01-01
Supplement: c6tb01881e1.pdf [file c6tb01881e1.pdf]

## Supplementary Information

### Synthesis of EDTA-assisted CeVO<sub>4</sub> nanorods as a robust peroxidase mimic towards colorimetric detection of H<sub>2</sub>O<sub>2</sub>

Peng Ju <sup>a, b</sup>, Yanzhen Yu <sup>c</sup>, Min Wang <sup>a, e</sup>, Yun Zhao <sup>a</sup>, Dun Zhang <sup>d</sup>, Chengjun Sun <sup>c, f, \*</sup>, Xiuxun  
Han <sup>a, b, \*</sup>

<sup>a</sup> *Laboratory of Clean Energy Chemistry and Materials, Lanzhou Institute of Chemical Physics, Chinese Academy of Sciences, 18 Tianshui Middle Road, Lanzhou 730000, PR China*

<sup>b</sup> *Qingdao Center of Resource Chemistry & New Materials, 36 Jinshui Road, Qingdao 266100, PR China*

<sup>c</sup> *Marine Ecology Center, The First Institute of Oceanography, State Oceanic Administration, 6 Xianxialing Road, Qingdao 266061, PR China*

<sup>d</sup> *Key Laboratory of Marine Environmental Corrosion and Bio-fouling, Institute of Oceanology, Chinese Academy of Sciences, 7 Nanhai Road, Qingdao 266071, PR China*

<sup>e</sup> *University of Chinese Academy of Sciences, 19 (Jia) Yuquan Road, Beijing 100039, PR China*

<sup>f</sup> *Laboratory of Marine Drugs and Bioproducts, Qingdao National Laboratory for Marine Science and Technology, Qingdao, 266071, PR China*

\* Corresponding authors:

Tel.: + 86-532-88963310; +86-931-4968054

Fax: + 86-532-88963253; +86-931-4968054

E-mail address: csun@fio.org.cn (C.J. Sun); xxhan@licp.cas.cn (X.X. Han)

**Table S1.** Comparison of  $K_m$  and  $V_{max}$  between CeVO<sub>4</sub>-2 NRs and HRP for H<sub>2</sub>O<sub>2</sub> and TMB.

| Catalyst                 | Substance                     | $K_m$ (mM) | $V_{max}$ (M/s)       | Reference |
|--------------------------|-------------------------------|------------|-----------------------|-----------|
| CeVO <sub>4</sub> -2 NRs | H <sub>2</sub> O <sub>2</sub> | 0.157      | $8.53 \times 10^{-8}$ | This work |
| CeVO <sub>4</sub> -2 NRs | TMB                           | 1.326      | $3.61 \times 10^{-8}$ | This work |
| HRP                      | H <sub>2</sub> O <sub>2</sub> | 0.214      | $2.46 \times 10^{-8}$ | S1, S2    |
| HRP                      | TMB                           | 0.275      | $1.24 \times 10^{-8}$ | S1, S2    |

**Table S2.** Comparison of mimetic enzyme activity in the linear range and detection limit of H<sub>2</sub>O<sub>2</sub> between CeVO<sub>4</sub>-2 NRs and other peroxidase mimics.

| Mimetic enzyme                                                                    | Linear range ( $\mu$ M) | Detection limit ( $\mu$ M) | Reference |
|-----------------------------------------------------------------------------------|-------------------------|----------------------------|-----------|
| CeVO <sub>4</sub> -2 NRs                                                          | 1~25                    | 0.07                       | This work |
| Fe <sub>3</sub> H <sub>9</sub> (PO <sub>4</sub> ) <sub>6</sub> ·6H <sub>2</sub> O | 57.4~525.8              | 1.0                        | S3        |
| CePO <sub>4</sub>                                                                 | 0~200                   | 1.03                       | S4        |
| MoS <sub>2</sub>                                                                  | 5~100                   | 1.5                        | S5        |
| Fe <sub>3</sub> O <sub>4</sub>                                                    | 5~100                   | 3.0                        | S6        |
| Co-Al LDH                                                                         | 10~50                   | 10.0                       | S7        |
| AgVO <sub>3</sub>                                                                 | 75~200                  | 5.0                        | S8        |

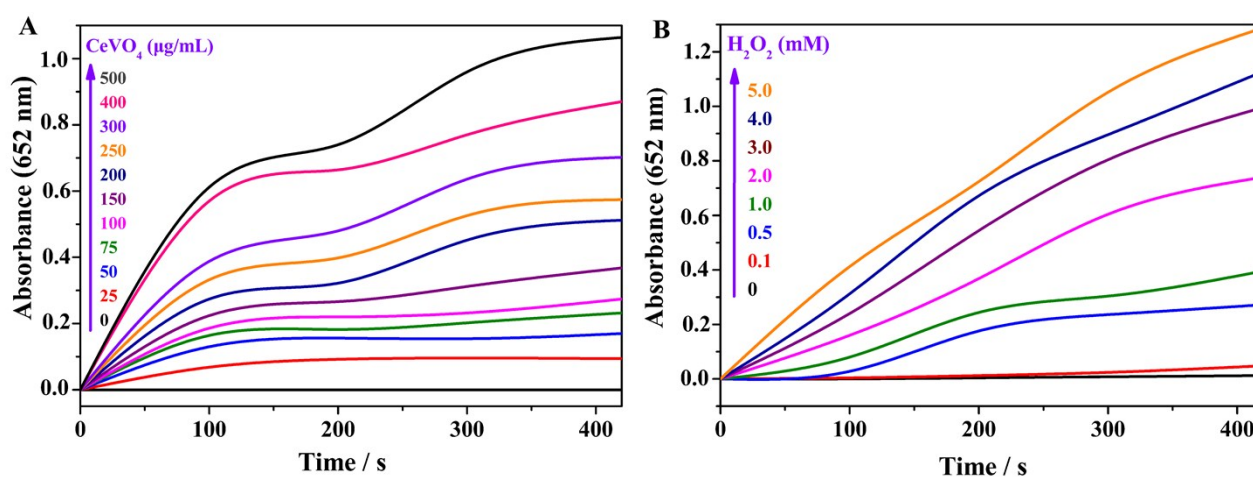**Fig. S1.** Time-dependent absorbance at 652 nm of 0.8 mM TMB reaction solutions in the absence or presence of different concentrations of CeVO<sub>4</sub>-2 (A) and different concentrations of H<sub>2</sub>O<sub>2</sub> (B) in 20.0 mM PBS (pH = 4.0) at room temperature.

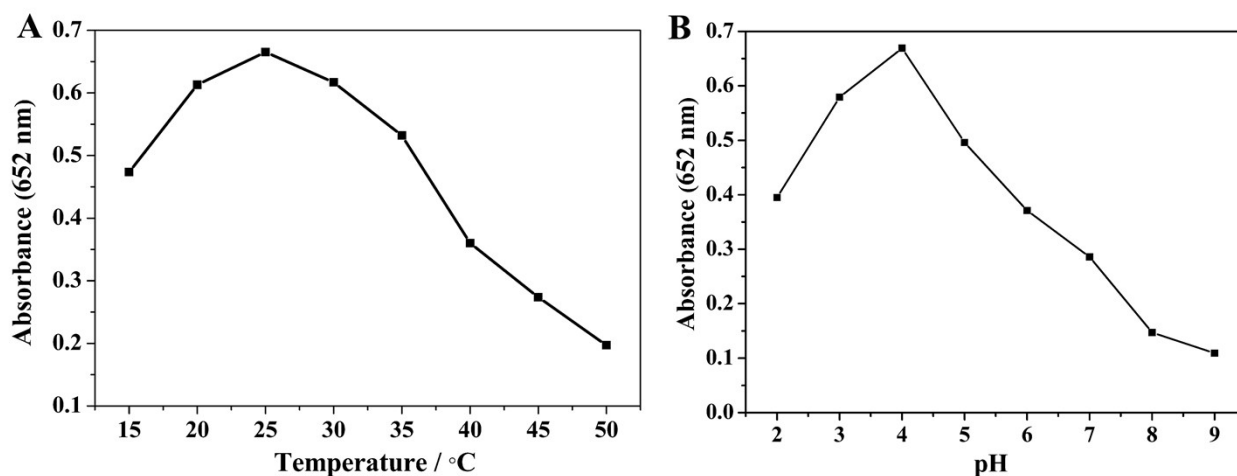

**Fig. S2.** Dependency of peroxidase mimetic activity of CeVO<sub>4</sub>-2 on temperature (A) and pH (B).

Experiments were conducted by using 300 µg/mL of CeVO<sub>4</sub>-2 in 20.0 mM PBS (pH = 4.0) with 2.0 mM H<sub>2</sub>O<sub>2</sub> and 0.8 mM TMB as substrates.

## References

- S1 Y. Lin, J. Ren and X. Qu, *Acc. Chem. Res.*, 2014, **47**, 1097-1105.
- S2 F.M. Qiao, L.J. Chen, X. Li, L. Li and S.Y. Ai, *Sensor. Actuator. B: Chem.*, 2014, **193**, 255-262.
- S3 T. Zhang, Y. Lu and G. Luo, *ACS Appl. Mater. Interfaces*, 2014, **6**, 14433-14438.
- S4 C.J. Lv, W.H. Di, Z.H. Liu, K.Z. Zheng and W.P. Qin, *Analyst*, 2014, **139**, 4547-4555.
- S5 T. Lin, L. Zhong, L. Guo, F. Fu and G. Chen, *Nanoscale*, 2014, **6**, 11856-11862.
- S6 H. Wei and E. Wang, *Anal. Chem.*, 2008, **80**, 2250-2254.
- S7 L.J. Chen, B. Sun, X. Wang, F.M. Qiao and S.Y. Ai, *J. Mater. Chem. B*, 2013, **1**, 2268-2274.
- S8 Z.B. Xiang, Y. Wang, P. Ju and D. Zhang, *Microchim. Acta*, 2016, **183**, 457-463.
